# Supplementary material
Source: PubMed Central journal article supplement (PMC4185256)
Supplement: NIHMS588104-supplement-02.pdf [file NIHMS588104-supplement-02.pdf]

SUPPLEMENTAL TABLE S2. List of taxon names that differ between Fig. 1 and GenBank records due to changes in taxonomy and identifications.

| <b>Taxon name in Fig. 1</b>          | <b>Taxon name in GenBank</b>                     |
|--------------------------------------|--------------------------------------------------|
| <i>Allographa cinerea</i>            | <i>Graphis cinerea</i>                           |
| <i>Allographa pavoniana</i>          | <i>Graphis pavoniana</i>                         |
| <i>Allographa ruiziana</i>           | <i>Graphis ruiziana</i>                          |
| <i>Anomolobarina anomala</i> 0       | <i>Pseudocyphellaria anomala</i>                 |
| <i>Anomolobarina anomala</i> 1       | <i>Pseudocyphellaria anomala</i>                 |
| <i>Aspicilia</i> sp.                 | <i>Circinaria contorta</i>                       |
| <i>Aspiciliopsis macrophthalma</i>   | <i>Placopsis macrophthalma</i>                   |
| <i>Aspilidea myrinii</i>             | <i>Aspicilia myrinii</i>                         |
| <i>Astrochapsa meridensis</i>        | <i>Chapsa meridensis, Topeliopsis meridensis</i> |
| <i>Buellia punctata</i> 0            | <i>Amandinea punctata</i>                        |
| <i>Buellia punctata</i> 1            | <i>Amandinea punctata</i>                        |
| <i>Buellia tesserata</i>             | <i>B. fimbriata</i>                              |
| <i>Buellia tesserata</i>             | <i>Buellia fimbriata</i>                         |
| <i>Callome tripartita</i>            | <i>Collema tripartitum</i>                       |
| <i>Caloplaca carphinea</i>           | <i>Usnochroma carphinea</i>                      |
| <i>Caloplaca chalybaea</i>           | <i>Pyrenodesmia chalybaea</i>                    |
| <i>Caloplaca decipiens</i>           | <i>Calogaya decipiens</i>                        |
| <i>Caloplaca flavorubescens</i>      | <i>Gyalolechia flavorubescens</i>                |
| <i>Caloplaca gomerana</i> 0          | <i>Gyalolechia gomerana</i>                      |
| <i>Caloplaca gomerana</i> 1          | <i>Caloplaca gloriae</i>                         |
| <i>Caloplaca marina</i>              | <i>Flavoplaca marina</i>                         |
| <i>Caloplaca ochracea</i>            | <i>Xanthocarpia ochracea</i>                     |
| <i>Caloplaca scopularis</i> 0        | <i>Athallia scopularis</i>                       |
| <i>Caloplaca scopularis</i> 1        | <i>Athallia scopularis</i>                       |
| <i>Caloplaca scoriophila</i>         | <i>Usnochroma scoriophila</i>                    |
| <i>Caloplaca scotoplaca</i>          | <i>Rufoplaca scotoplaca</i>                      |
| <i>Caloplaca thallincola</i>         | <i>Variospora thallincola</i>                    |
| <i>Caloplaca verruculifera</i>       | <i>Polycauliona verruculifera</i>                |
| <i>Caloplaca xantholyta</i>          | <i>Leproplaca xantholyta</i>                     |
| <i>Caloplaca xanthostigmoidea</i>    | <i>Gyalolechia xanthostigmoidea</i>              |
| <i>Circinaria izcoana</i>            | <i>Aspicilia izcoana</i>                         |
| <i>Circinaria leproscens</i>         | <i>Aspicilia leproscens</i>                      |
| <i>Cladia glaucolivida</i>           | <i>Ramalinora glaucolivida</i>                   |
| <i>Crocodia aurata</i>               | <i>Pseudocyphellaria aurata</i>                  |
| <i>Crocodia clathrata</i>            | <i>Pseudocyphellaria clathrata</i>               |
| <i>Diploschistes actinostomus</i>    | <i>Diplischistes scruposus</i>                   |
| <i>Enchylium conglomeratum</i>       | <i>Collema conglomeratum</i>                     |
| <i>Enchylium polycarpon</i>          | <i>Collema polycarpon</i>                        |
| <i>Enchylium tenax</i>               | <i>Collema tenax</i>                             |
| <i>Flavoparmelia baltimorensis</i> 1 | <i>F. caperata</i>                               |
| <i>Frutidella pullata</i>            | <i>Lecidea pullata</i>                           |
| <i>Fulgensia bracteata</i>           | <i>Gyalolechia bracteata</i>                     |

---

|                                    |                                                      |
|------------------------------------|------------------------------------------------------|
| <i>Fulgensia fulgens</i>           | <i>Gyalolechia fulgens</i>                           |
| <i>Gowardia nigricans</i>          | <i>Alectoria nigricans</i>                           |
| <i>Gregorella humida</i> 1         | <i>Moelleropsis humida</i>                           |
| <i>Gyalecta herculana</i>          | <i>Belonia herculana</i>                             |
| <i>Gyalecta russula</i>            | <i>Belonia russula</i>                               |
| <i>Gyalidea hyalinescens</i>       | <i>G. hyalinus</i>                                   |
| <i>Ionaspis lacustris</i> 0        | <i>Hymenelia lacustris</i>                           |
| <i>Ionaspis lacustris</i> 1        | <i>Hymenelia lacustris</i>                           |
| <i>Ionaspis lacustris</i> 2        | <i>Hymenelia lacustris</i>                           |
| <i>Jackelixia ligulata</i>         | <i>Dufourea ligulata, Xanthoria ligulata</i>         |
| <i>Lathagrium auriforme</i>        | <i>Collema auriforme</i>                             |
| <i>Lathagrium cristatum</i>        | <i>Collema cristatum</i>                             |
| <i>Lathagrium undulatum</i>        | <i>Collema undulatum</i>                             |
| <i>Lecania atrosanguinea</i>       | <i>Lecidea atrosanguinea</i>                         |
| <i>Lecanora filamentosa</i>        | <i>Lecidea hercynica</i>                             |
| <i>Lecidea</i> sp. 1               | <i>Lecidea</i> sp. 2                                 |
| <i>Leimonis erratica</i>           | <i>Micarea erratica</i>                              |
| <i>Lepraria finkii</i> 0           | <i>L. lobificans</i>                                 |
| <i>Lepraria finkii</i> 1           | <i>L. lobificans</i>                                 |
| <i>Lepraria finkii</i> 2           | <i>L. lobificans</i>                                 |
| <i>Lobarina oregana</i>            | <i>Lobaria oregana</i>                               |
| <i>Lobarina scrobiculata</i>       | <i>Lobaria scrobiculata</i>                          |
| <i>Lobothallia farinosa</i>        | <i>Aspicilia farinosa</i>                            |
| <i>Massjukiella candelaria</i>     | <i>Polycauliona candelaria, Xanthoria candelaria</i> |
| <i>Massjukiella polycarpa</i> 0    | <i>Xanthoria polycarpa</i>                           |
| <i>Massjukiella polycarpa</i> 1    | <i>Xanthoria polycarpa</i>                           |
| <i>Mycobilimbia berengeriana</i>   | <i>Lecidea berengeriana</i>                          |
| <i>Myriospora scabrida</i>         | <i>Acarospora scabrida</i>                           |
| <i>Myriospora smaragdula</i>       | <i>Acarospora smaragdula</i>                         |
| <i>Nelsenium usnicum</i>           | <i>Lepraria usnica</i>                               |
| <i>Ocellularia aurantia</i> 0      | <i>Ampliotrema auratum</i>                           |
| <i>Ocellularia aurantia</i> 1      | <i>Ampliotrema auratum</i>                           |
| <i>Ocellularia inturgescens</i>    | <i>Thelotrema inturgescens</i>                       |
| <i>Ocellularia profunda</i> 1      | <i>O. pulchra</i>                                    |
| <i>Parmeliella appalachensis</i> 1 | <i>Parmeliella</i> sp.                               |
| <i>Parmostictina dubia</i>         | <i>Pseudocyphellaria dubia</i>                       |
| <i>Parmostictina hirsuta</i>       | <i>Pseudocyphellaria hirsuta</i>                     |
| <i>Parmostictina mallota</i>       | <i>Pseudocyphellaria malota</i>                      |
| <i>Parmostictina obvoluta</i>      | <i>Pseudocyphellaria obvoluta</i>                    |
| <i>Parmotrema carneopruinatum</i>  | <i>Canoparmelia carneopruinata</i>                   |
| <i>Parmotrema crozalsianum</i>     | <i>Canoparmelia crozalsiana</i>                      |
| <i>Peltigera sorediifera</i>       | <i>P. lambinonii</i>                                 |
| <i>Physcia</i> aff. <i>aipolia</i> | <i>Ph. aipolia</i>                                   |
| <i>Podosticta berberina</i>        | <i>Pseudocyphellaria berberina</i>                   |
| <i>Podosticta endochrysoides</i>   | <i>Pseudocyphellaria endochrysoides</i>              |
| <i>Porpidia flavicunda</i> 0       | <i>Porpidia flavocaerulescens</i>                    |

---

---

|                                      |                                   |
|--------------------------------------|-----------------------------------|
| <i>Porpidia flavicunda</i> 1         | <i>Porpidia flavocaerulescens</i> |
| <i>Protoparmeliopsis achariana</i> 0 | <i>Lecanora achariana</i>         |
| <i>Protoparmeliopsis achariana</i> 1 | <i>Lecanora achariana</i>         |
| <i>Protoparmeliopsis muralis</i> 1   | <i>Lecanora muralis</i>           |
| <i>Pseudochapsa phlyctidioides</i>   | <i>Thelotrema phlyctidioides</i>  |
| <i>Pseudoleptogium diffractum</i>    | <i>Leptogium diffractum</i>       |
| <i>Ramboldia arandensis</i>          | <i>Pyrrhospora arandensis</i>     |
| <i>Ramboldia laeta</i>               | <i>Pyrrhospora laeta</i>          |
| <i>Ramboldia russula</i>             | <i>Pyrrhospora russula</i>        |
| <i>Remotrachyna adducta</i>          | <i>Hypotrachyna adducta</i>       |
| <i>Remotrachyna ciliata</i>          | <i>Hypotrachyna ciliata</i>       |
| <i>Remotrachyna flexilis</i>         | <i>Hypotrachyna flexilis</i>      |
| <i>Remotrachyna incognita</i>        | <i>Hypotrachyna incognita</i>     |
| <i>Remotrachyna koyaensis</i>        | <i>Hypotrachyna koyaensis</i>     |
| <i>Rhizocarpon macrosporum</i>       | <i>Rhizocarpon sphaerosporum</i>  |
| <i>Ricasolia amplissima</i>          | <i>Lobaria amplissima</i>         |
| <i>Ricasolia quercizans</i> 0        | <i>Lobaria quercizans</i>         |
| <i>Ricasolia quercizans</i> 1        | <i>Lobaria quercizans</i>         |
| <i>Ricasolia virens</i>              | <i>Lobaria virens</i>             |
| <i>Rusavskia elegans</i> 0           | <i>Xanthoria elegans</i>          |
| <i>Rusavskia elegans</i> 1           | <i>Xanthoria elegans</i>          |
| <i>Rusavskia sorediata</i>           | <i>Xanthoria sorediata</i>        |
| <i>Scytinium callopismum</i>         | <i>Collema callopismum</i>        |
| <i>Scytinium fragile</i>             | <i>Collema fragile</i>            |
| <i>Scytinium fragrans</i>            | <i>Collema fragrans</i>           |
| <i>Scytinium gelatinosum</i>         | <i>Leptogium gelatinosum</i>      |
| <i>Scytinium imbricatum</i>          | <i>Leptogium imbricatum</i>       |
| <i>Scytinium lichenoides</i>         | <i>Leptogium lichenoides</i>      |
| <i>Scytinium magnussonii</i>         | <i>Leptogium magnussonii</i>      |
| <i>Scytinium microphylloides</i>     | <i>Leptogium microphylloides</i>  |
| <i>Scytinium parvum</i>              | <i>Collema parvum</i>             |
| <i>Scytinium plicatile</i>           | <i>Leptogium plicatile</i>        |
| <i>Scytinium pulvinatum</i>          | <i>Leptogium pulvinatum</i>       |
| <i>Scytinium schraderi</i>           | <i>Leptogium schraderi</i>        |
| <i>Scytinium subaridum</i>           | <i>Leptogium subaridum</i>        |
| <i>Scytinium tenuissimum</i>         | <i>Leptogium tenuissimum</i>      |
| <i>Scytinium turgidum</i>            | <i>Leptogium turgidum</i>         |
| <i>Sphaeropezia arctoalpina</i>      | <i>Bryodiscus arctoalpinus</i>    |
| <i>Sphaeropezia capreae</i> 0        | <i>Odontotrema</i> sp.            |
| <i>Sphaeropezia capreae</i> 1        | <i>Odontotrema</i> sp.            |
| <i>Sphaeropezia diffindens</i>       | <i>Odontotrema diffindens</i>     |
| <i>Sphaeropezia lyckselensis</i> 0   | <i>Odontotrema</i> sp.            |
| <i>Sphaeropezia lyckselensis</i> 1   | <i>Odontotrema</i> sp.            |
| <i>Thamnolecania brialmontii</i>     | <i>Lecania brialmontii</i>        |
| <i>Trapelia glebulosa</i> 1          | <i>T. involuta</i>                |
| <i>Vahliella leucophaea</i>          | <i>Fuscopannaria leucophaea</i>   |

---

---

|                                    |                                                |
|------------------------------------|------------------------------------------------|
| <i>Varicellaria hemisphaerica</i>  | <i>Pertusaria hemisphaerica</i>                |
| <i>Varicellaria lactea</i>         | <i>Pertusaria lactea</i>                       |
| <i>Varicellaria velata</i>         | <i>Pertusaria velata</i>                       |
| <i>Wirthiotrema glaucopallens</i>  | <i>Thelotrema glaucopallens</i>                |
| <i>Wirthiotrema trypaneoides</i>   | <i>Myriotrema trypaneoides</i>                 |
| <i>Xanthodactylon flammeum 0</i>   | <i>Dufourea flammea</i>                        |
| <i>Xanthodactylon flammeum 1</i>   | <i>Dufourea flammea</i>                        |
| <i>Xanthodactylon turbinatum</i>   | <i>Dufourea turbinata, Xanthoria turbinata</i> |
| <i>Xanthokarrooa karrooensis</i>   | <i>Dufourea karrooensis</i>                    |
| <i>Xanthoparmelia azaniensis</i>   | <i>Almbornia azaniensis</i>                    |
| <i>Xanthoparmelia exornata</i>     | <i>Namakwa exornata</i>                        |
| <i>Xanthoparmelia ovealmbornii</i> | <i>Almbornia cafferensis</i>                   |
| <i>Xanthoparmelia patagonica</i>   | <i>Omphalodiella patagonica</i>                |
| <i>Xanthoria andina</i>            | <i>Xanthoria sp.</i>                           |
| <i>Xylographa soralifera</i>       | <i>X. vitiligo</i>                             |

---
