# Supplementary material
Source: PubMed Central journal article supplement (PMC4185256)
Supplement: NIHMS588104-supplement-03.pdf [file NIHMS588104-supplement-03.pdf]

SUPPLEMENTAL TABLE S3. Primer information and PCR settings used by the Stenroos lab for this project. Primers and PCR protocols used by the Lutzoni lab for this project can be found in Lutzoni et al. (2004) and Hofstetter et al. (2007).

| <b>Loci/PCR info</b>          | <b>nucSSU</b>                          | <b>nucLSU</b>              | <b>mitSSU</b>          | <b><i>RPB1</i> (A-C)</b> |
|-------------------------------|----------------------------------------|----------------------------|------------------------|--------------------------|
| PCR primers                   | nu-SSU-0021-5' <sup>1</sup>            | LR0R <sup>3</sup>          | mtSSU1-KL <sup>6</sup> | gRPB1-Af <sup>7</sup>    |
|                               | nu-SSU-0072-5', NS17UCB <sup>1,2</sup> | LR5 <sup>4</sup>           | mtSSU2-KL <sup>6</sup> | fRPB1-Cr <sup>8</sup>    |
|                               | nu-SSU-0819-5', NS21UCB <sup>1,2</sup> | LR7 <sup>4</sup>           |                        |                          |
|                               | nu-SSU-0852-3', NS20UCB <sup>1,2</sup> |                            |                        |                          |
|                               | nu-SSU-1750-3', NS24UCB <sup>1,2</sup> |                            |                        |                          |
| Additional sequencing primers | nu-SSU-0402-5', NS19UCB <sup>1,2</sup> | nu-LSU-362-5' <sup>5</sup> | –                      | –                        |
|                               | nu-SSU-0497-3', NS18UCB <sup>1,2</sup> | nu-LSU-401-3' <sup>5</sup> |                        |                          |
|                               | nu-SSU-1203-5', NS23UCB <sup>1,2</sup> |                            |                        |                          |
|                               | nu-SSU-1293-3', NS22UCB <sup>1,2</sup> |                            |                        |                          |
| Initial denaturation          | 95°C 5 min.                            | 95°C 5 min.                | 95°C 5 min.            | 95°C 5 min.              |
| Phase 1                       | 5 cycles                               | 5 cycles                   | 5 cycles               | 5 cycles                 |
|                               | 95°C 30 sek.                           | 95°C 30 sek.               | 95°C 30 sek.           | 95°C 30 sek.             |
|                               | 55°C 30 sek.                           | 55°C 30 sek.               | 52°C 30 sek.           | 54°C 30 sek.             |
|                               | 72°C 1 min.                            | 72°C 1 min.                | 72°C 1 min.            | 72°C 1 min.              |
| Phase 2                       | 30 cycles                              | 30 cycles                  | 30 cycles              | 30 or 35 cycles          |
|                               | 95°C 30 sek.                           | 95°C 30 sek.               | 95°C 30 sek.           | 95°C 30 sek.             |
|                               | 53°C 30 sek.                           | 53°C 30 sek.               | 50°C 30 sek.           | 52°C 30 sek.             |
|                               | 72°C 1 min.                            | 72°C 1 min.                | 72°C 1 min.            | 72°C 1 min.              |
| Final extension               | 72°C 7 min.                            | 72°C 7 min.                | 72°C 7 min.            | 72°C 7 min.              |

<sup>1</sup> Gargas and DePriest (1996); <sup>2</sup> Gargas and Taylor (1992); <sup>3</sup> Vilgalys website (<http://biology.duke.edu/fungi/mycolab/primers.htm>); <sup>4</sup> Vilgalys and Hester (1990); <sup>5</sup> Döring et al. (2000); <sup>6</sup> Lohtander et al. (2002); <sup>7</sup> Stiller and Hall (1997); <sup>8</sup> Matheny et al. (2002).

## References

Döring, H., Clerc, P., Grube, M., Wedin, M., 2000. Mycobiont-specific PCR primers for the amplification of nuclear ITS and LSU rDNA from lichenized ascomycetes. *Lichenologist* 32, 200-204.

- Gargas, A., DePriest, P.T., 1996. A nomenclature for fungal PCR primers with examples from intron-containing SSU rDNA. *Mycologia* 88, 745-748.
- Gargas, A., Taylor, J.W., 1992. Polymerase chain reaction (PCR) primers for amplifying and sequencing 18S rDNA from lichenized fungi. *Mycologia* 84, 589-592.
- Hofstetter, V., Miadlikowska, J., Kauff, F., Lutzoni, F., 2007. Phylogenetic comparison of protein-coding versus ribosomal RNA-coding sequence data: a case study of the Lecanoromycetes (Ascomycota). *Mol. Phylogenet. Evol.* 44, 412-426.
- Lohtander, K., Oksanen, I., Rikkinen, J., 2002. A phylogenetic study of *Nephroma* (lichen-forming Ascomycota). *Mycol. Res.* 106, 777-787.
- Lutzoni, F., Kauff, F., Cox, C., McLaughlin, D., Celio, G., Dentinger, B., Padamsee, M., Hibbett, D., James, T.Y., Baloch, E., Grube, M., Reeb, V., Hofstetter, V., Schoch, C., Arnold, A.E., Miadlikowska, J., Spatafora, J., Johnson, D., Hambleton, S., Crockett, M., Shoemaker, R., Sung, G.H., Lücking, R., Lumbsch, T., O'Donnell, K., Binder, M., Diederich, P., Ertz, D., Gueidan, C., Hansen, K., Harris, R. C., Hosaka, K., Lim, Y.W., Matheny, B., Nishida, H., Pfister, D., Rogers, J., Rossman, A., Schmitt, I., Sipman, H., Stone, J., Sugiyama, J., Yahr, R., Vilgalys, R., 2004. Assembling the fungal tree of life: progress, classification, and evolution of subcellular traits. *Am. J. Bot.* 91, 1446-1480.
- Matheny, P.B., Liu, Y.J., Ammirati, J.F., Hall, B.D., 2002. Using RPB1 sequences to improve phylogenetic inference among mushrooms (*Inocybe*, Agaricales). *Am. J. Bot.* 89, 688-698.
- Stiller, J.W., Hall, B.D., 1997. The origin of red algae: implications for plastid evolution. *PNAS* 94, 4520-4525.
- Vilgalys, R., Hester, M., 1990. Rapid genetic identification and mapping of enzymatically amplified ribosomal DNA from several *Cryptococcus* species. *J. Bacteriol.* 172, 4238-4246.
