# Supplementary material
Source: PubMed Central journal article supplement (PMC4185256)

- Above threshold
- Below threshold
- Missing or inapplicable
- Conflict at ML-BP  $\geq 70\%$

Threshold values

|              |    |    |            |
|--------------|----|----|------------|
| 5+4+3+2-gene | 70 | 70 | 5+4+3-gene |
| 5+4-gene     | 70 | 70 | 5-gene     |

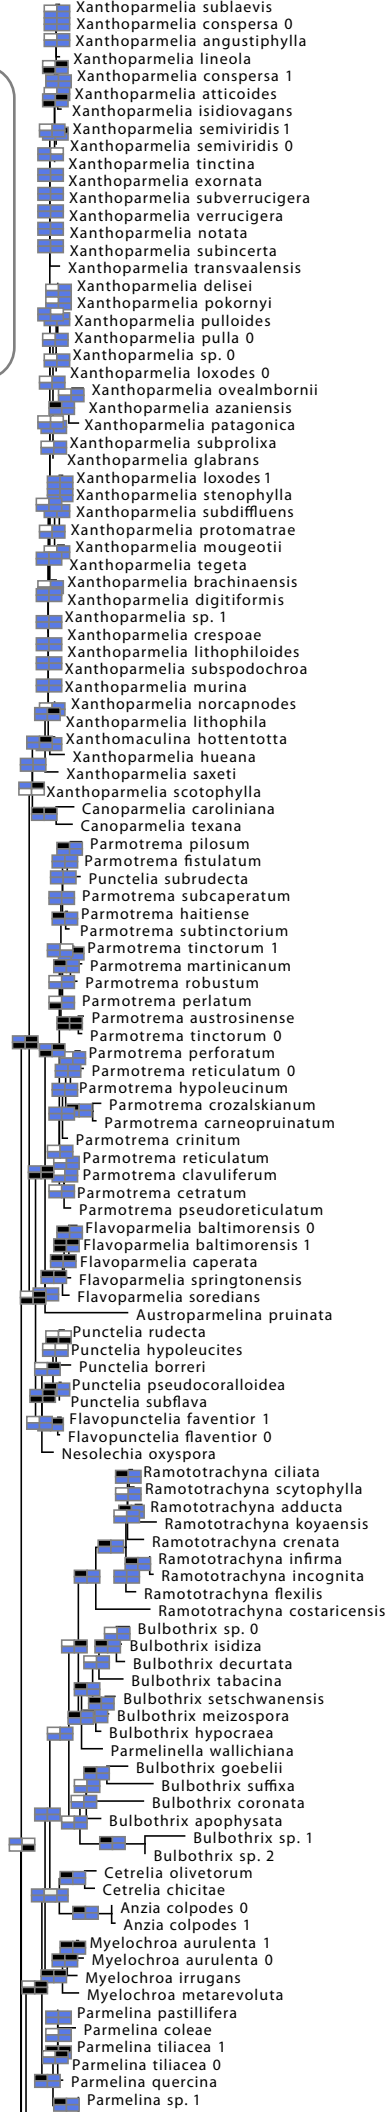

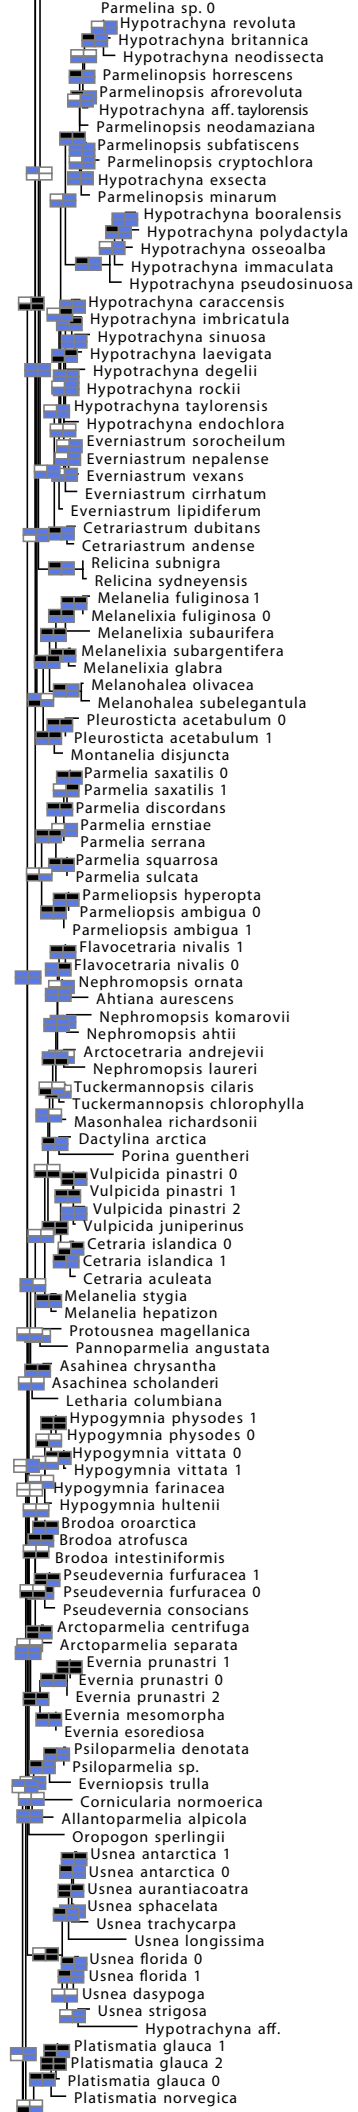

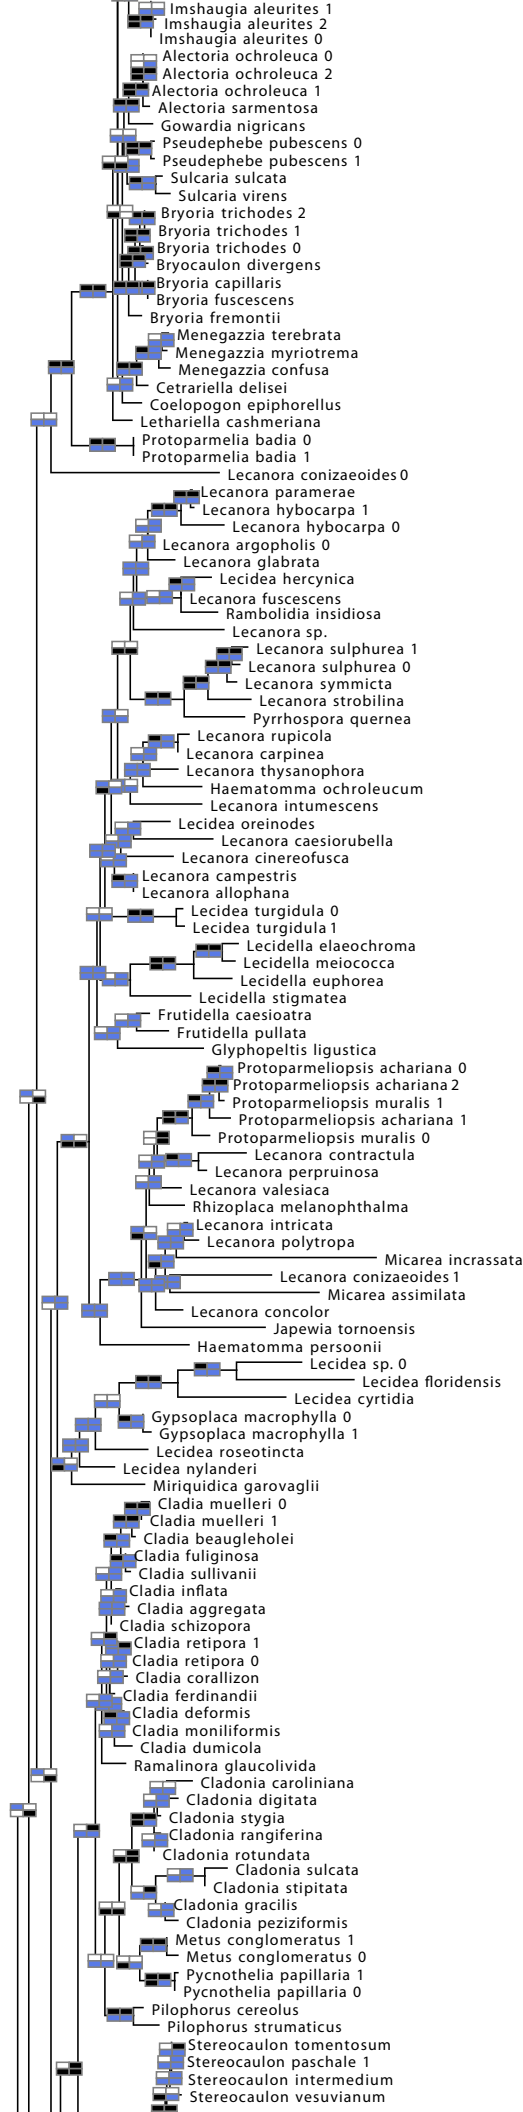

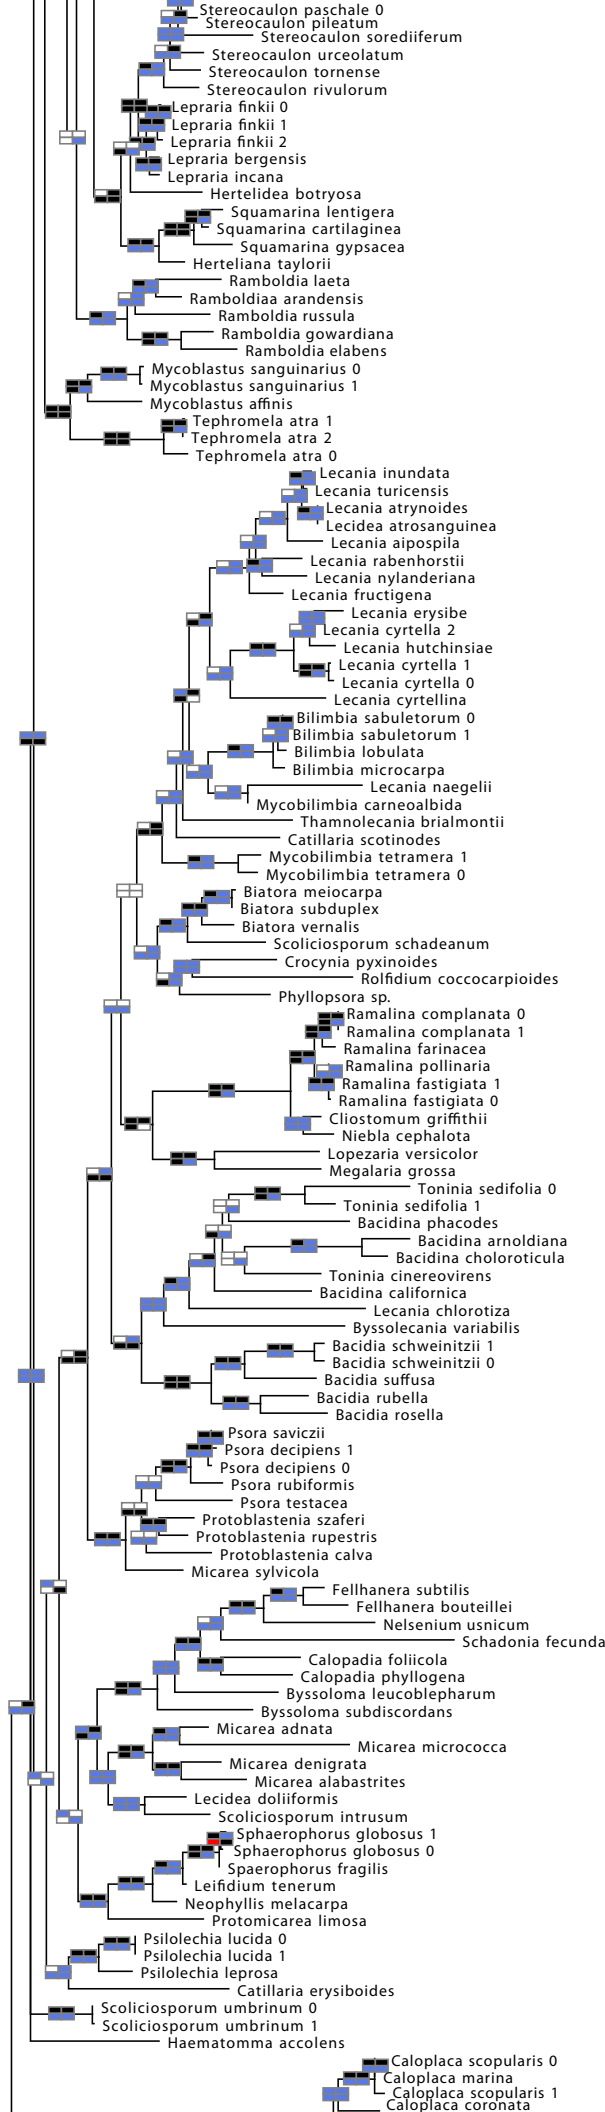

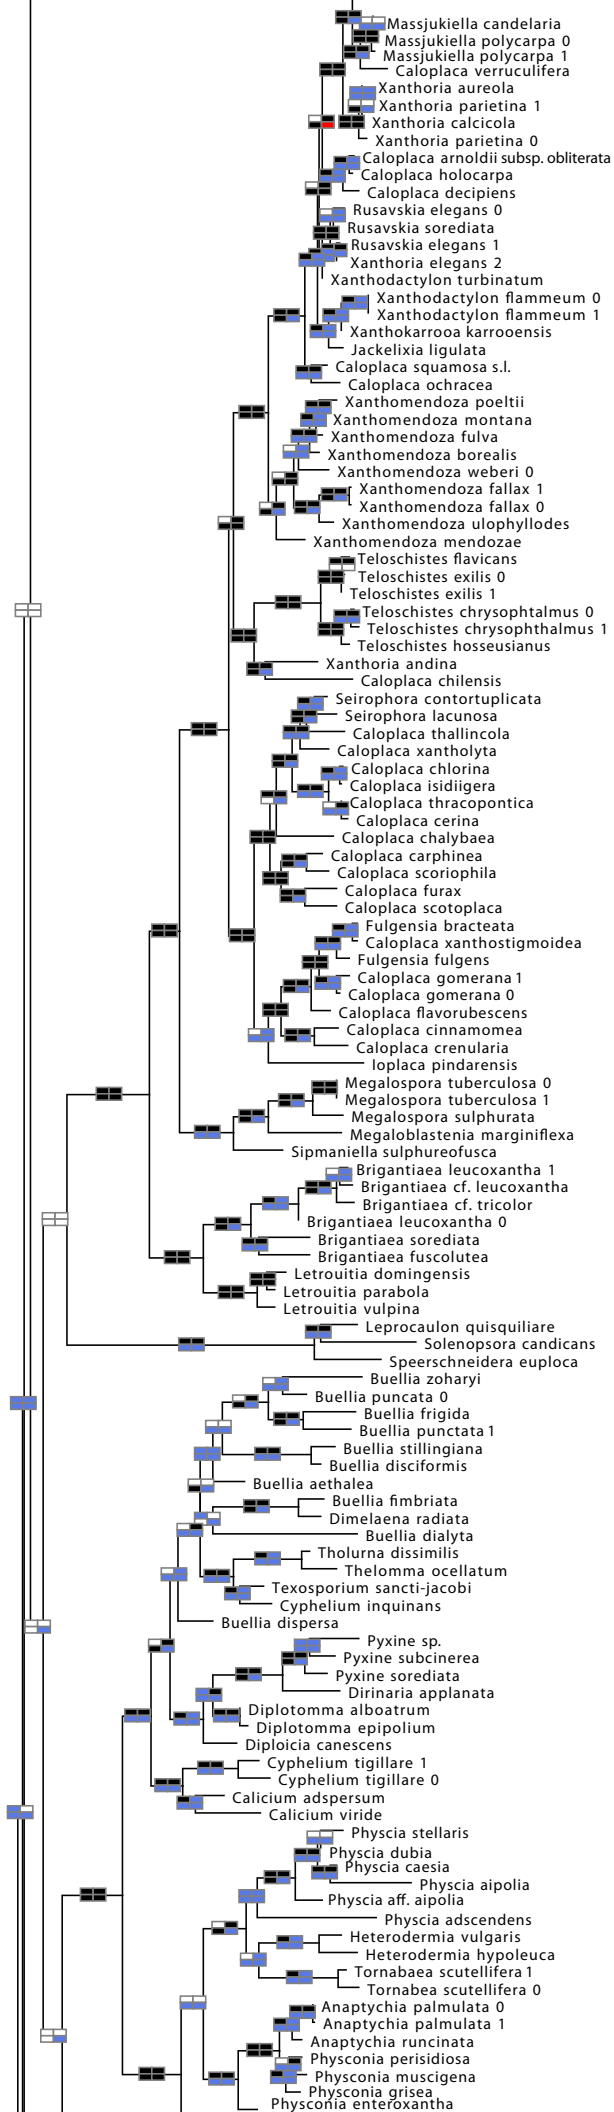

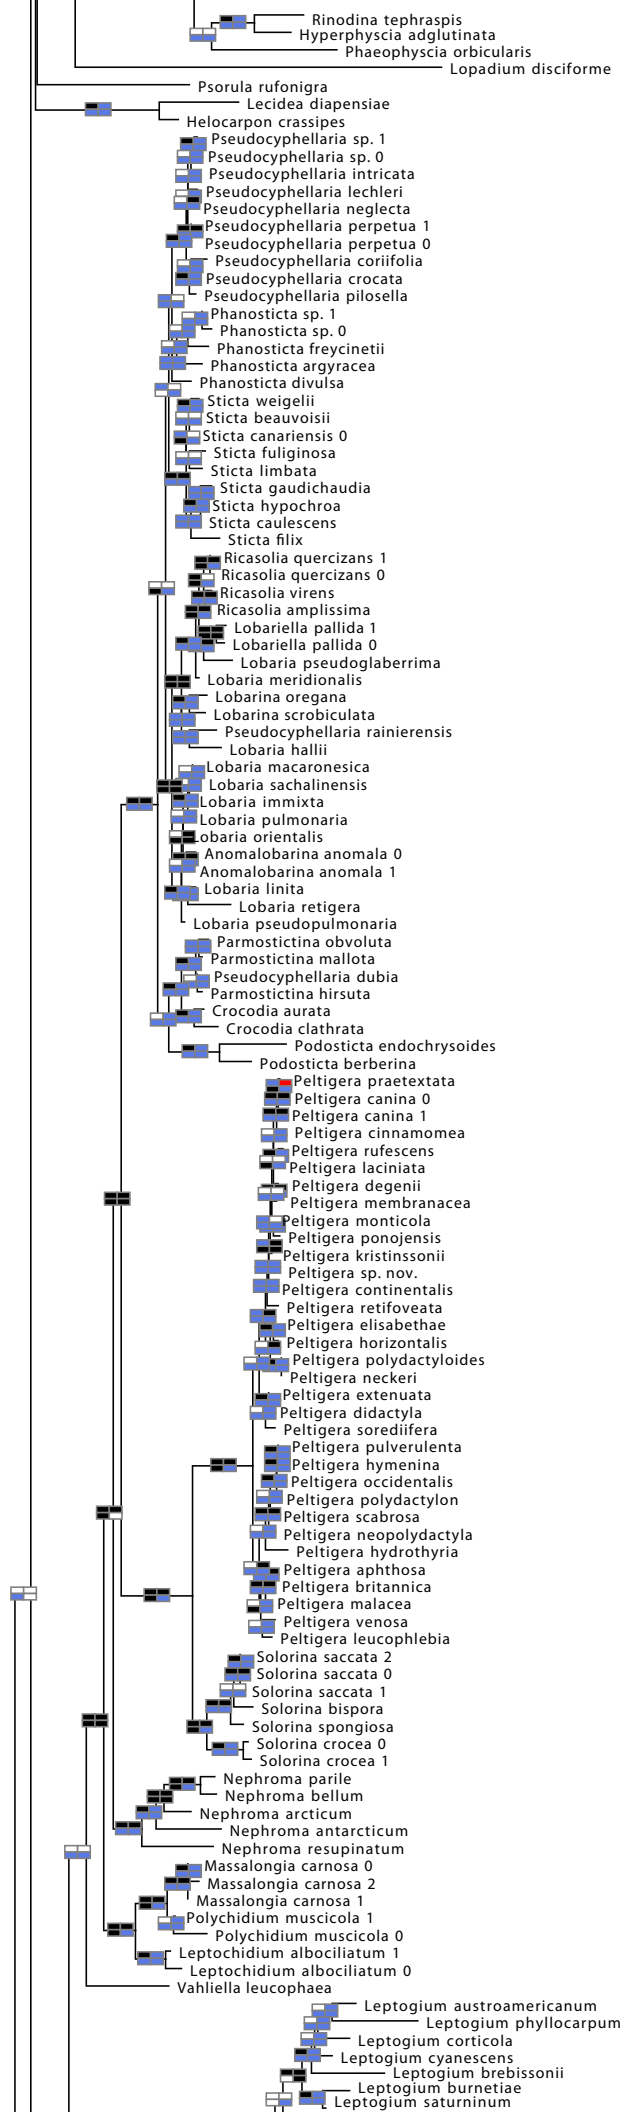

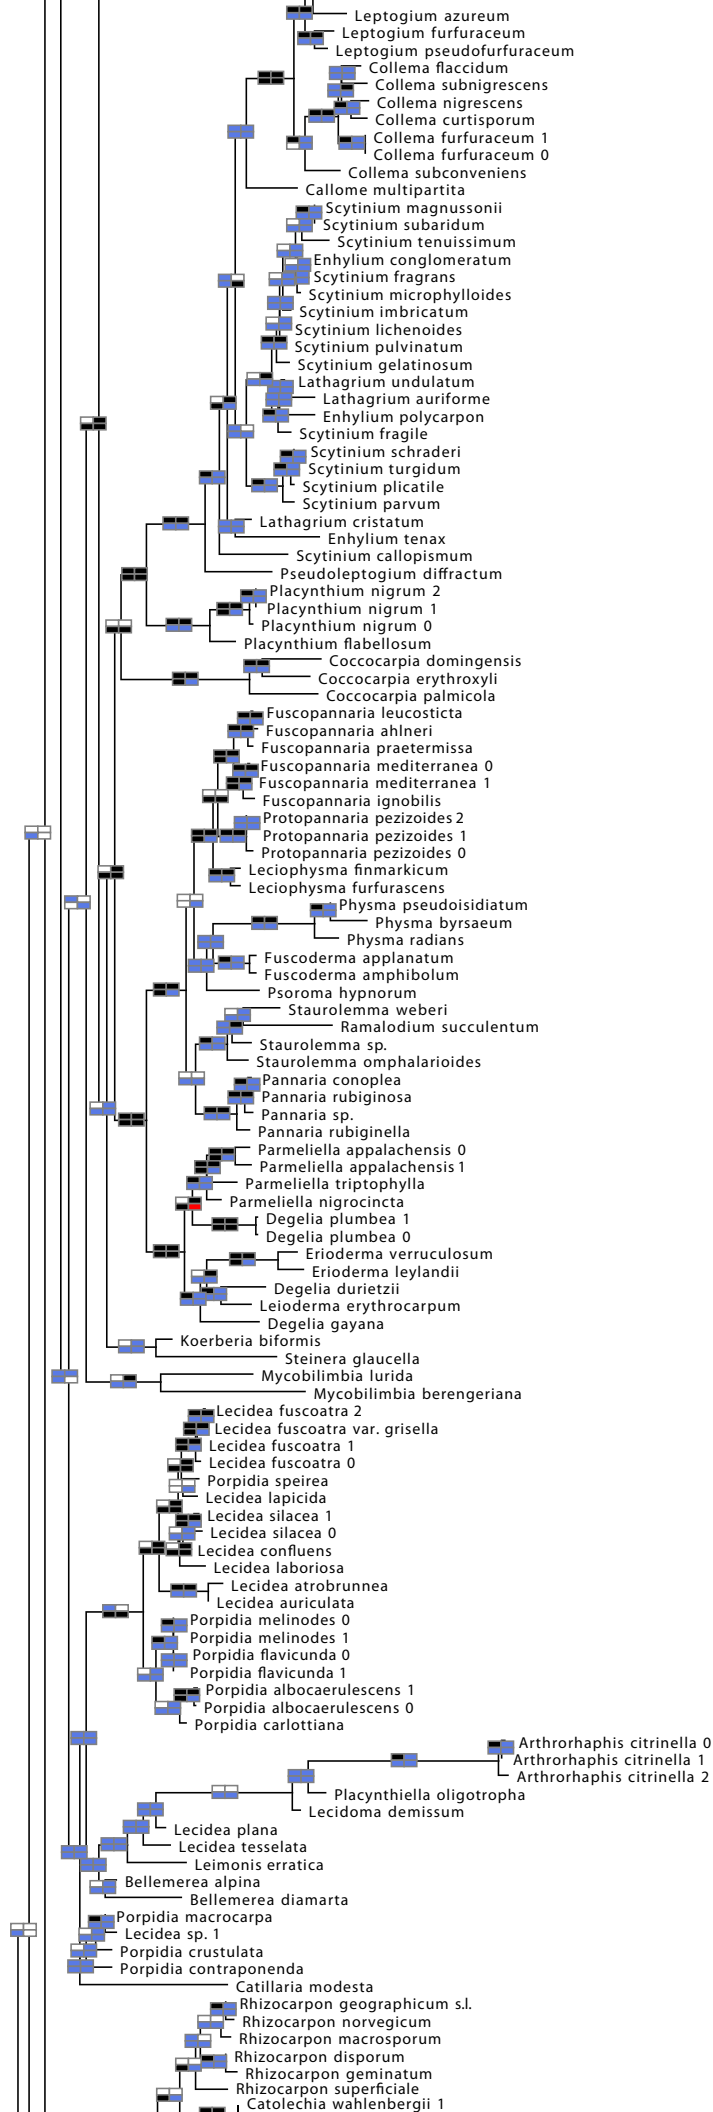

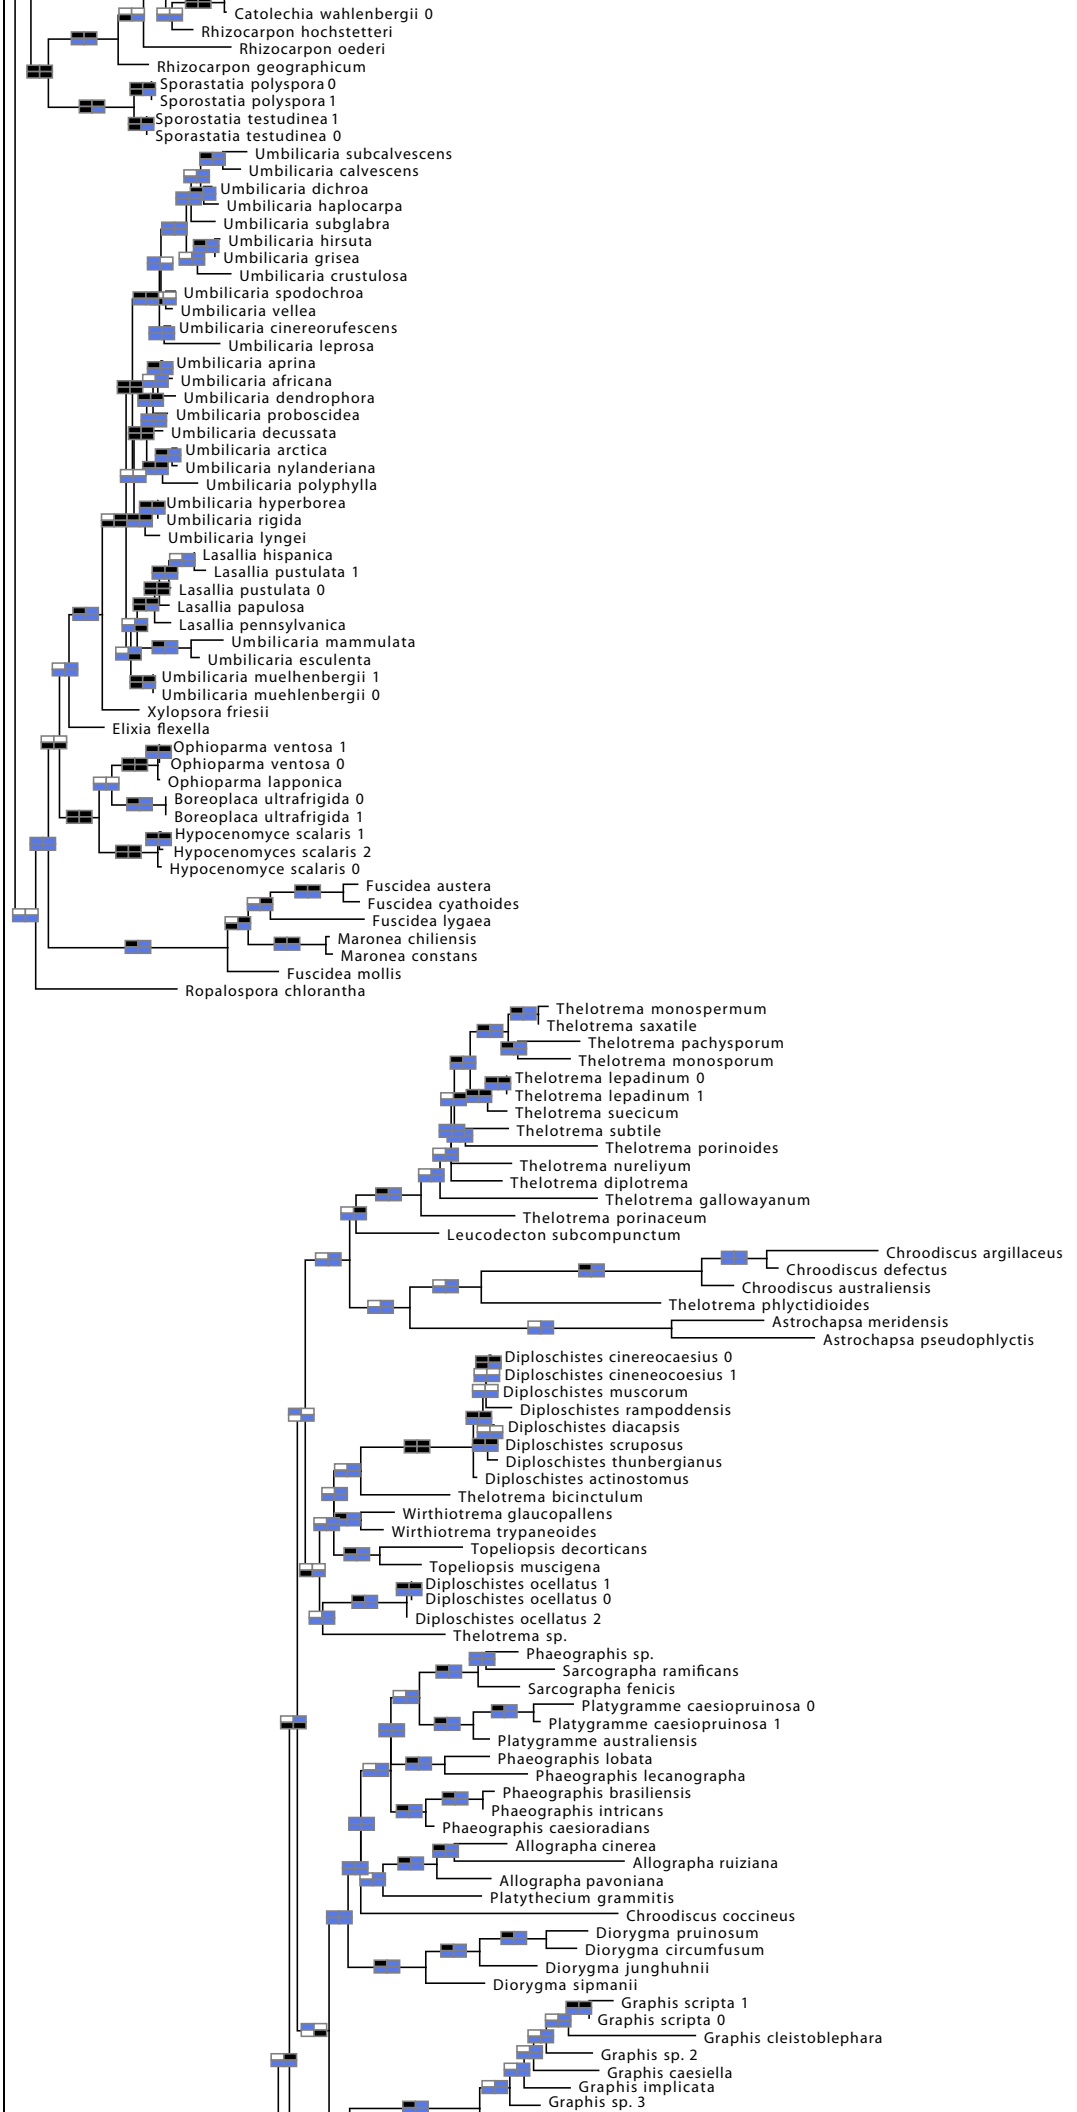



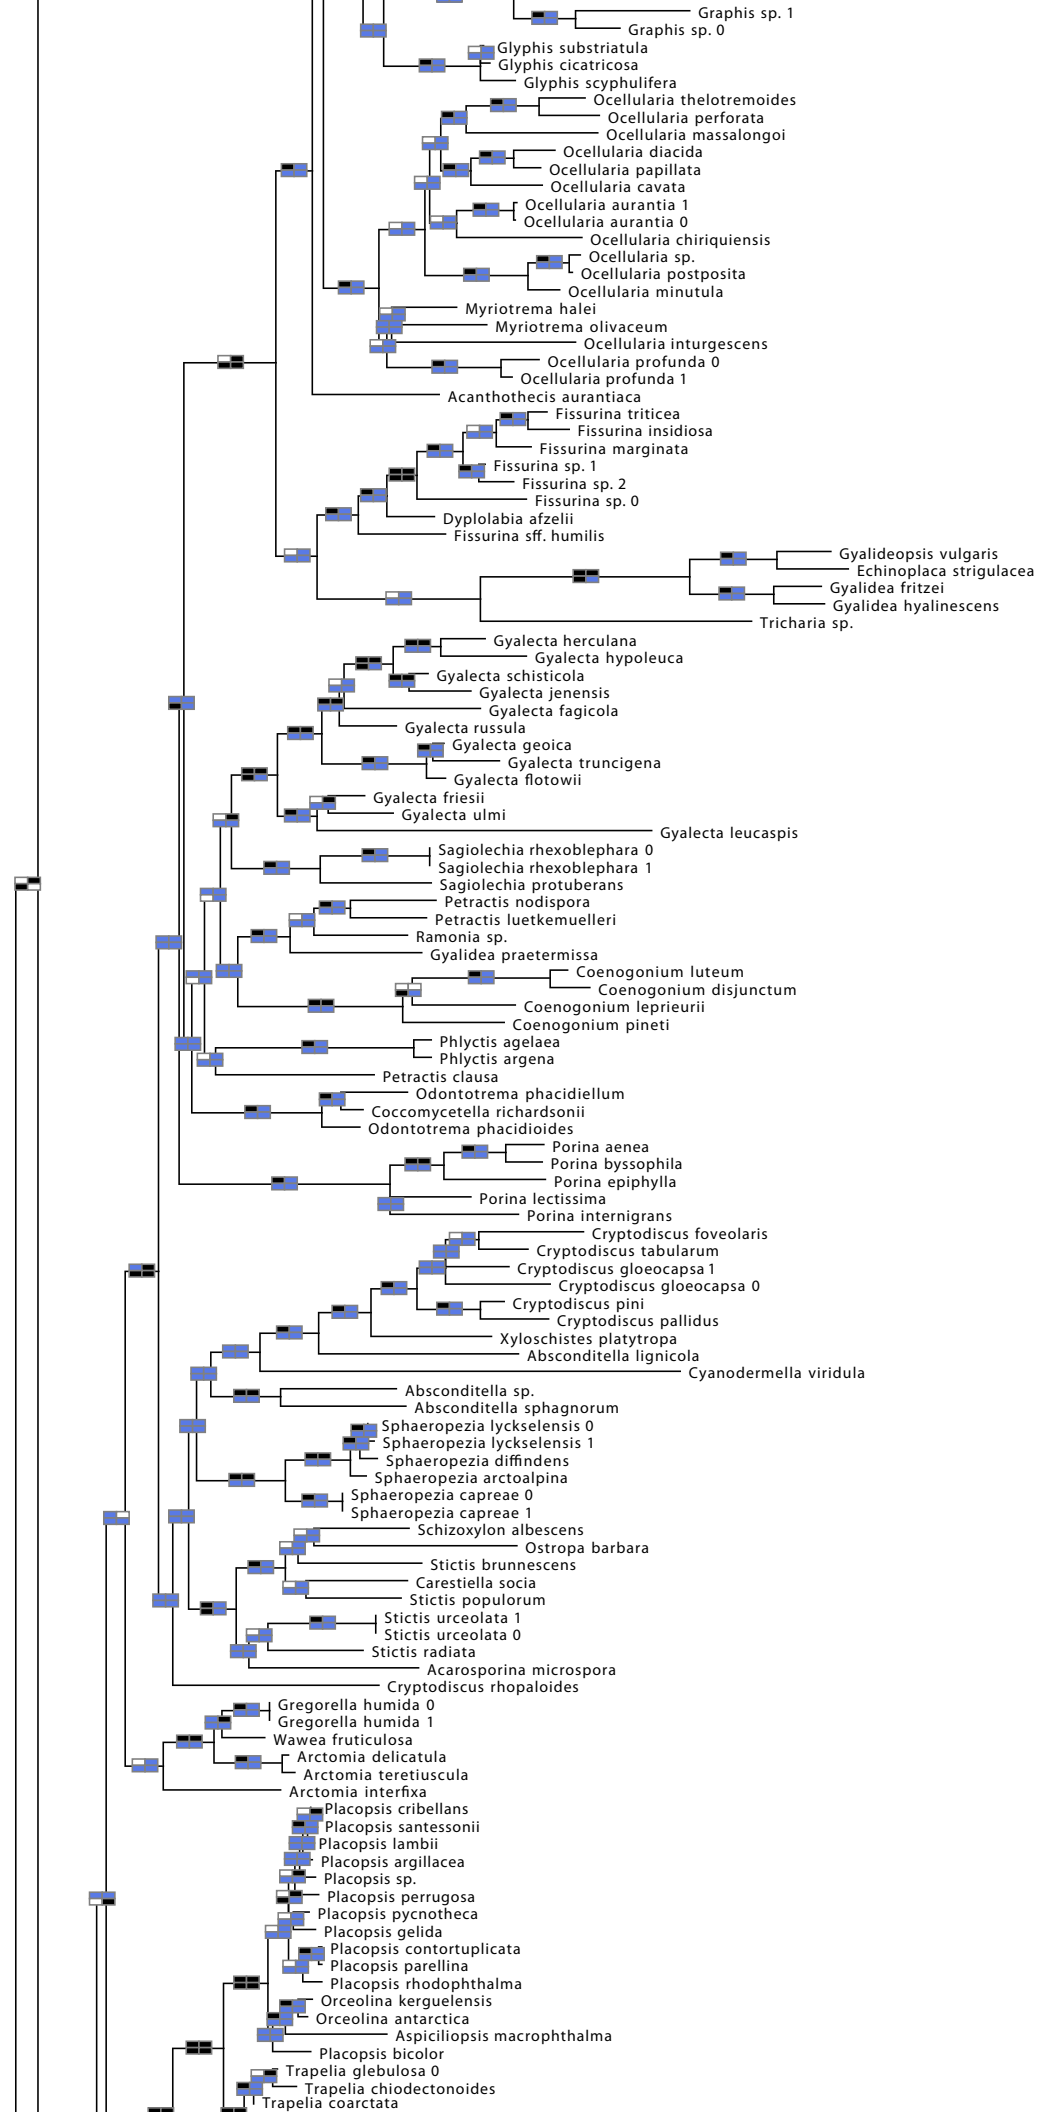

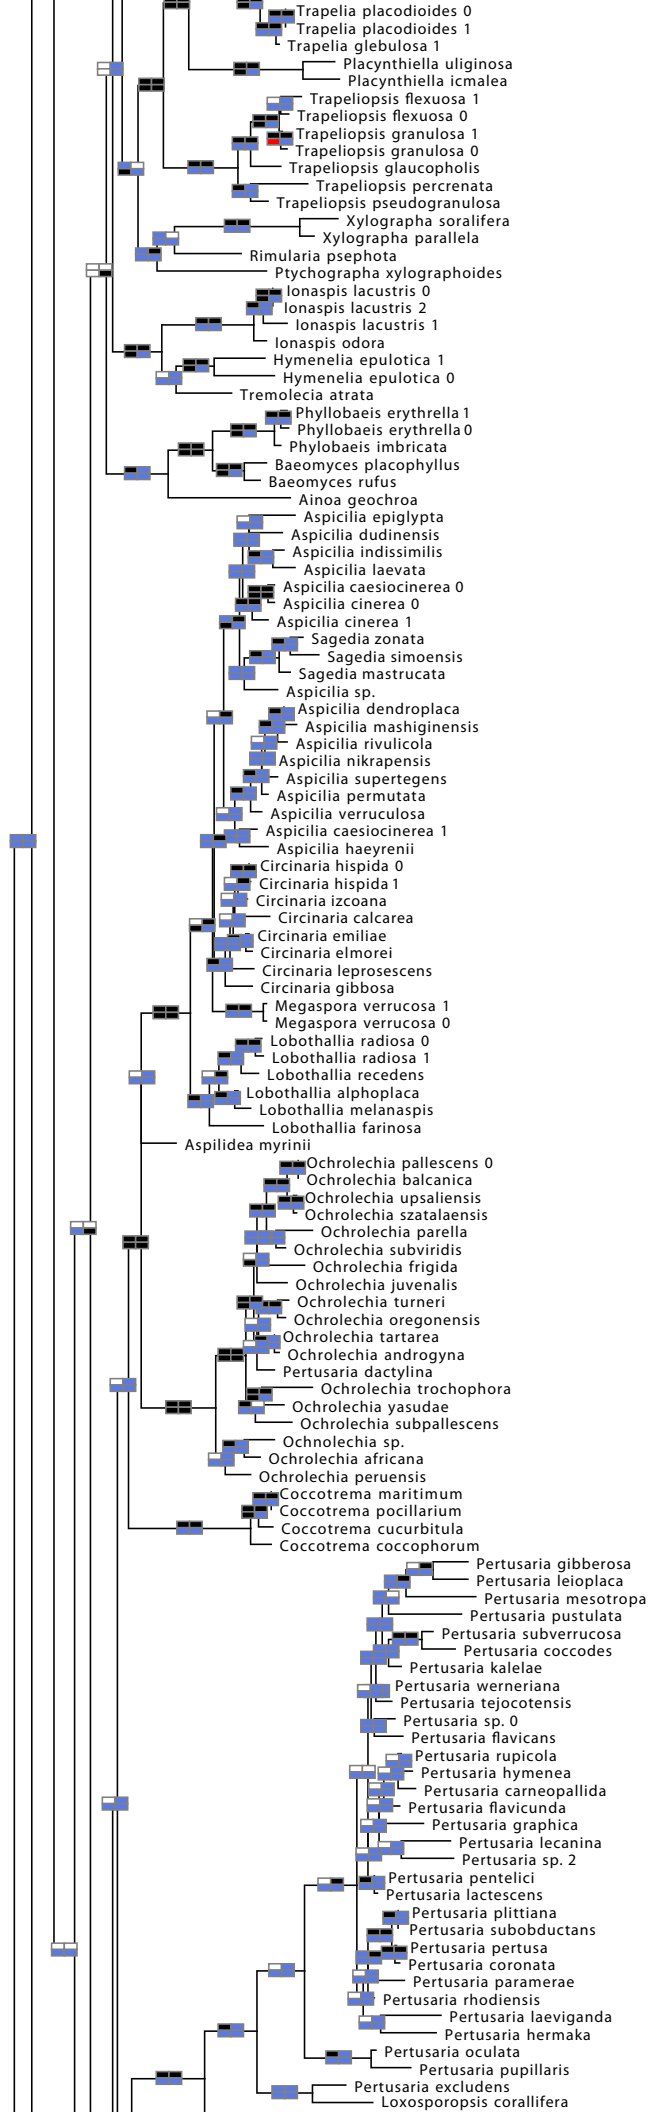

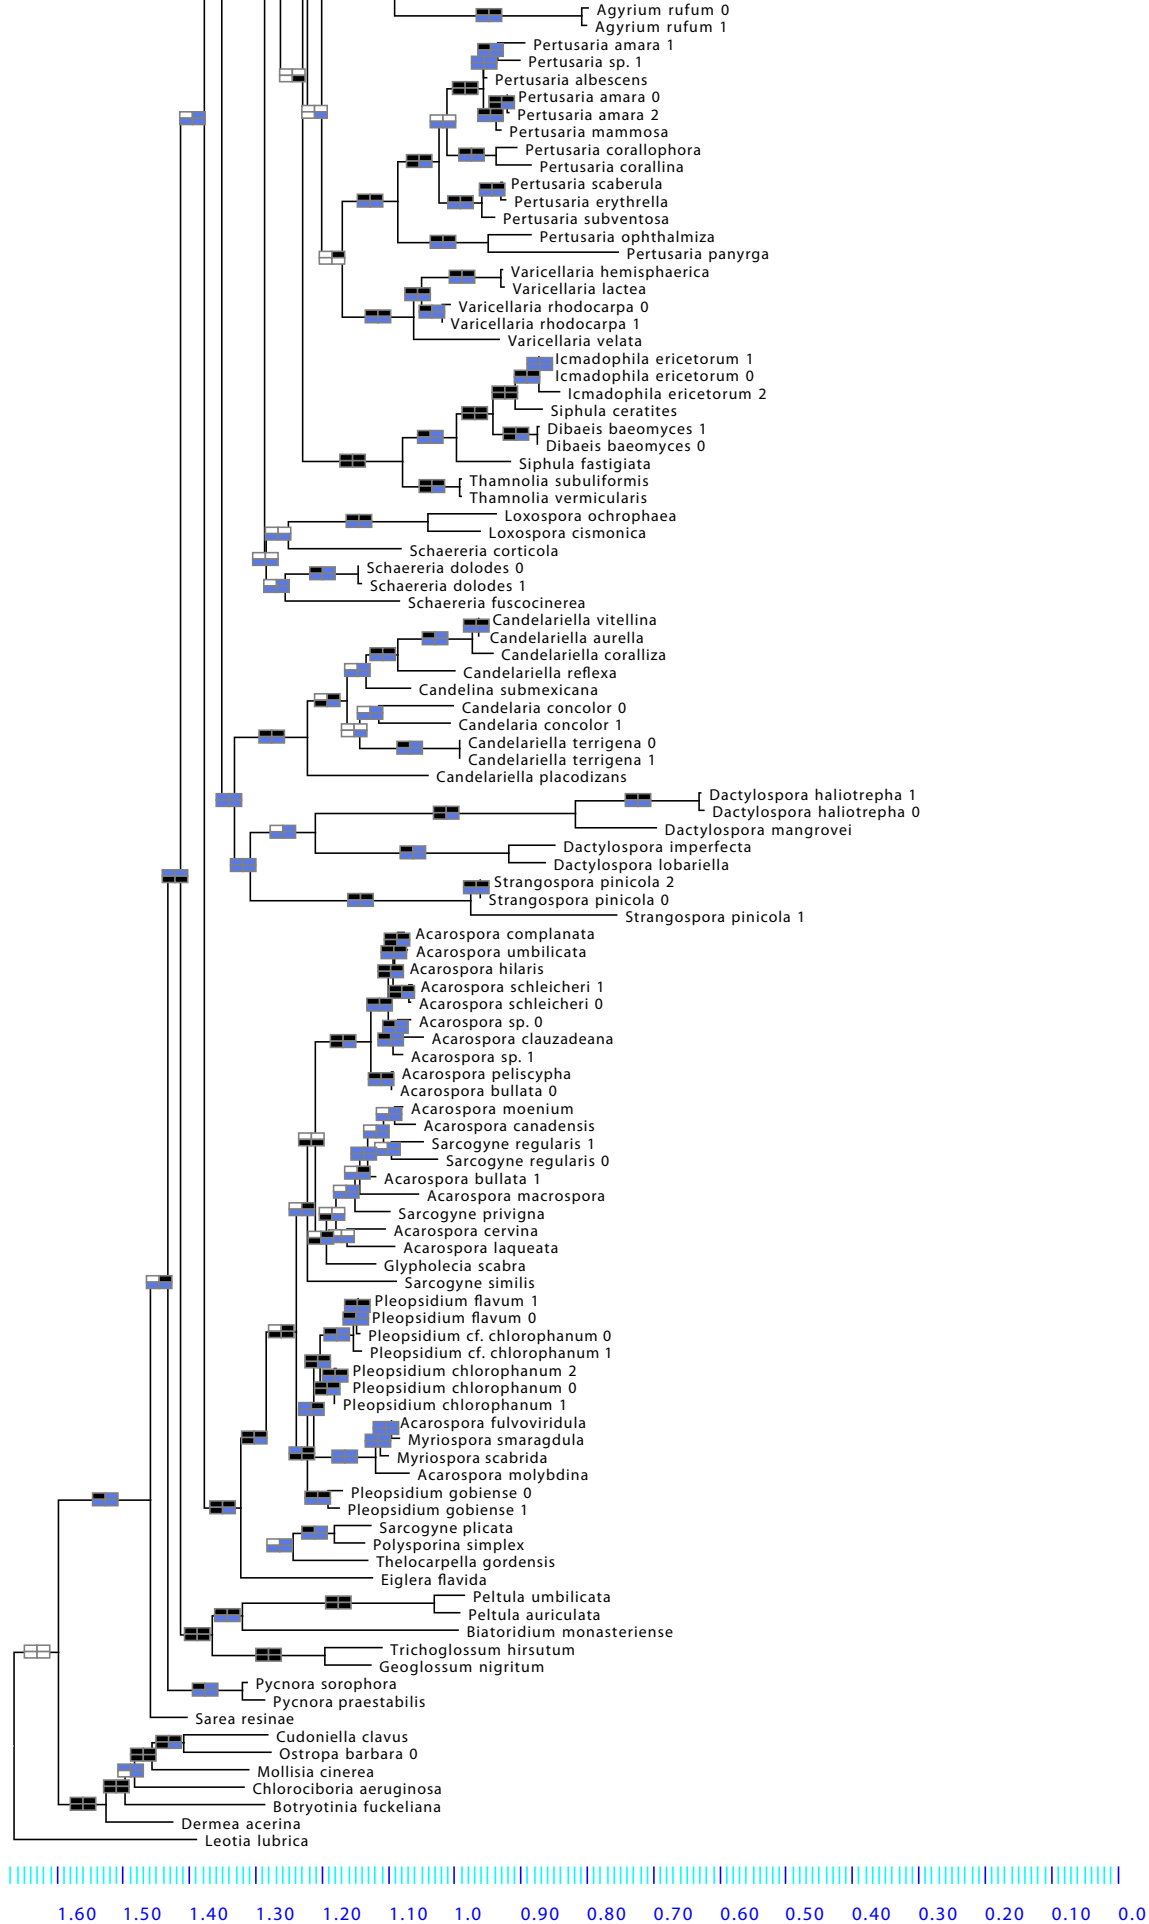

Supplement: NIHMS588104-supplement-06.pdf [file NIHMS588104-supplement-06.pdf]
