# Supplementary material
Source: PubMed Central journal article supplement (PMC4185256)

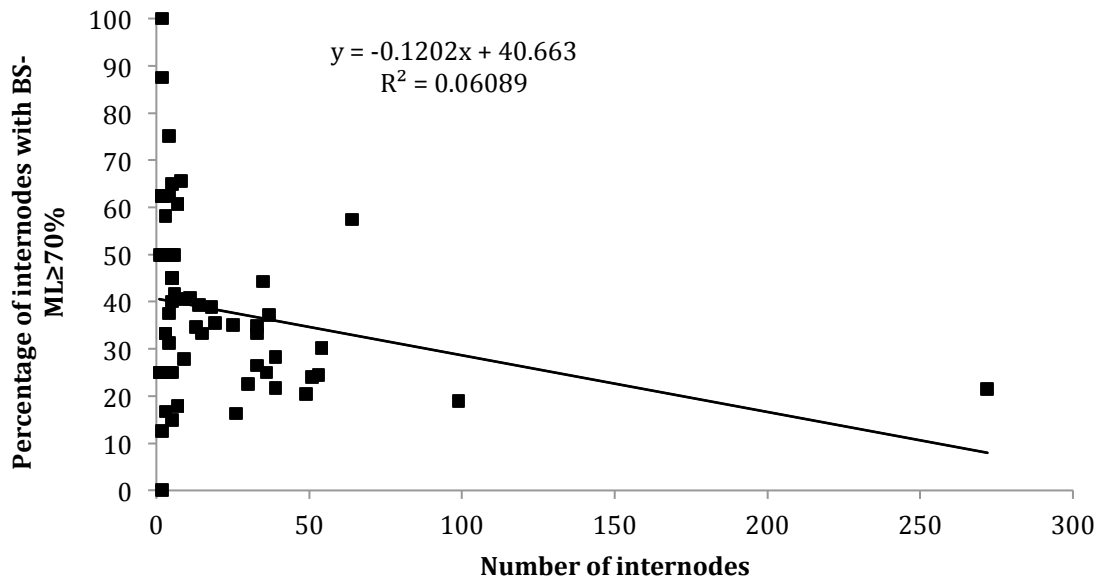

Supplement: NIHMS588104-supplement-07.pdf [file NIHMS588104-supplement-07.pdf]
